# Supplementary material for: Chinese Herbal Medicine Used With or Without Conventional Western Therapy for COVID-19: An Evidence Review of Clinical Studies
Source: PubMed Central journal article supplement (PMC7953048; doi:10.3389/fphar.2020.583450), 2021-02-26
Supplement: datasheet1.pdf [file datasheet1.pdf]

## Supplement

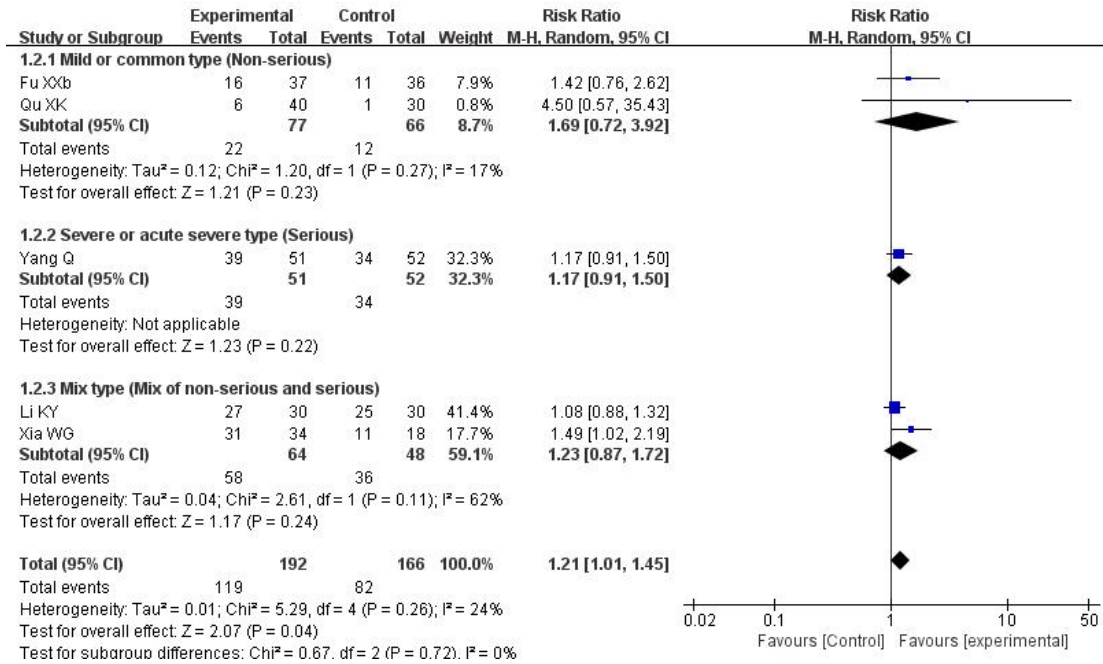

**Supplement-Figure 1 Subgroup analysis of Cure rate based on the severity of COVID-19**

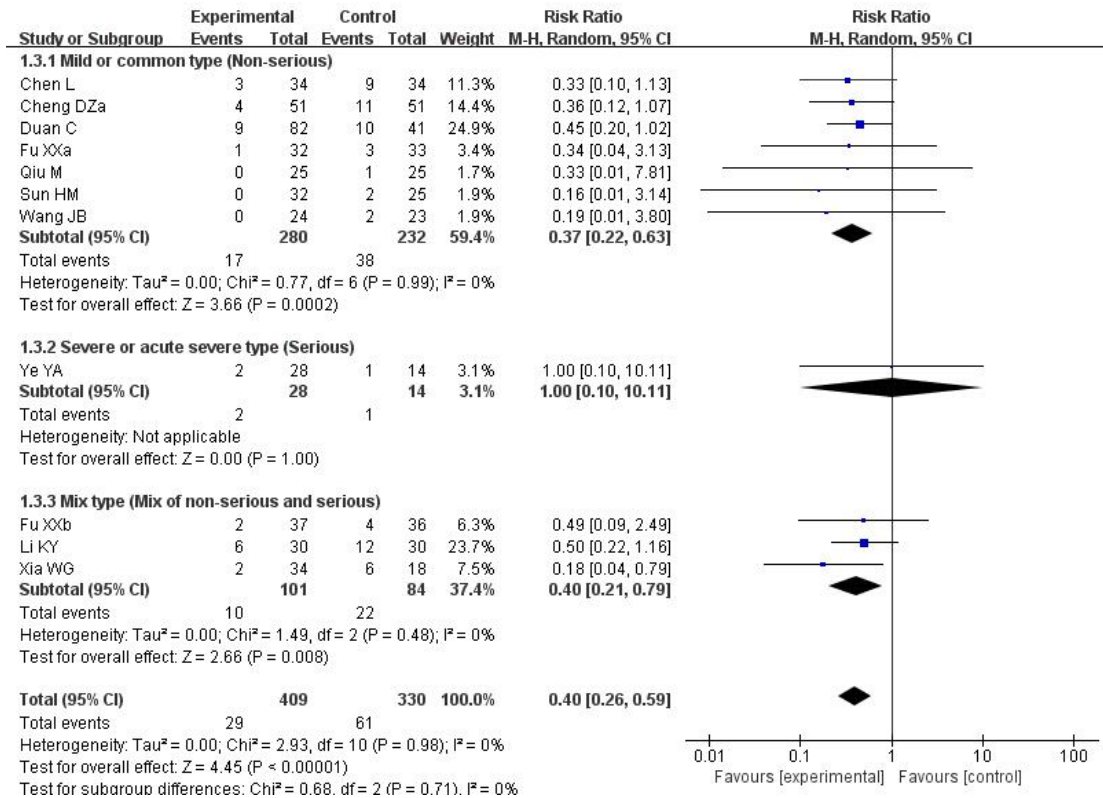

**Supplement-Figure 2 Subgroup analysis of the aggravation rate based on the severity of COVID-19**

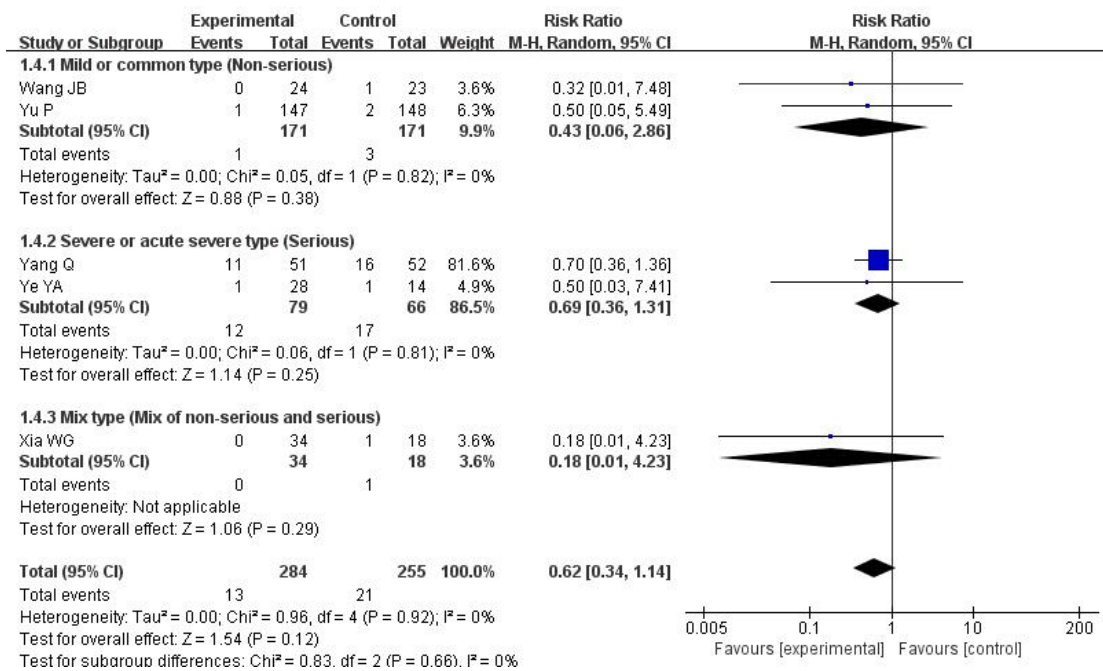

**Supplement-Figure 3 Subgroup analysis of the mortality rate based on the severity of COVID-19**
